# Supplementary material
Source: PubMed Central journal article supplement (PMC7747042)

## Supplemental Online Content

El-Jawahri A, LeBlanc TW, Kavanaugh A, et al. Effectiveness of integrated palliative and oncology care for patients with acute myeloid leukemia: a randomized clinical trial. *JAMA Oncol*. Published online December 17, 2020. doi:10.1001/jamaoncol.2020.6343

**eTable 1.** Participants Characteristics

**eTable 2.** Secondary Outcomes Adjusted for Multiple Testing Using False Discovery Rate

**eFigure 1.** Palliative Care Visit Content

**eFigure 2.** Focus of PC Visits During Subsequent Hospitalizations

This supplemental material has been provided by the authors to give readers additional information about their work.

## Online Supplemental Files

**eTable 1: Participants Characteristics:** AML = Acute Myeloid Leukemia; QOL = quality of life; HADS-Anxiety = Hospital Anxiety and Depression Scale – Anxiety; HADS-Depression = Hospital Anxiety and Depression Scale – Depression; PHQ-9 = Patient Health Questionnaire-9; ESAS-Total = Edmonton Symptom Assessment Scale- Total Score; PTSD = Post Traumatic Stress Disorder Symptoms.

**eTable 2: Secondary Outcomes Adjusted for Multiple Testing Using False Discovery Rate:** FDR = False Discovery Rate. The FDR method treats p-values as significant if they remain smaller than a critical value,  $[(i/m)Q]$ , wherein  $i$  = the p-value rank,  $m$  = number of tests, and  $Q$  = chosen FDR.

**eFigure 1: Palliative Care Visit Content: 1A: Focus of PC Visits During Hospitalization for Intensive Chemotherapy:** PC = Palliative Care. **2B: Symptoms Addressed during PC Visits:** PC = Palliative Care.

**eFigure 2: Focus of PC Visits During Subsequent Hospitalizations:** PC = Palliative Care

**eTable 1**

| <b>Patient Characteristics</b>        | <b>Usual Care<br/>(N = 74)</b> | <b>Integrated Palliative and<br/>Oncology Care (N = 86)</b> |
|---------------------------------------|--------------------------------|-------------------------------------------------------------|
| <b>Age, median (range)</b>            | 65.2 (22.1-80.1)               | 63.0 (19.7-77.8)                                            |
| <b>Female sex, n (%)</b>              | 27 (36.5%)                     | 37 (43.0%)                                                  |
| <b>Race, n (%)</b>                    |                                |                                                             |
| White                                 | 63 (85.1%)                     | 75 (87.2%)                                                  |
| Black                                 | 7 (9.5%)                       | 8 (9.4%)                                                    |
| American Indian                       | 2 (2.7%)                       | 2 (2.3%)                                                    |
| Asian                                 | 2 (2.7%)                       | 0                                                           |
| Other                                 | 0                              | 1 (1.2%)                                                    |
| <b>Hispanic, n (%)</b>                | 0 (0.0%)                       | 5 (6.02%)                                                   |
| <b>Diagnosis type, n (%)</b>          |                                |                                                             |
| Newly diagnosed AML                   | 50 (67.6%)                     | 59 (68.6%)                                                  |
| Relapsed AML                          | 16 (21.6%)                     | 21 (24.4%)                                                  |
| Refractory AML                        | 8 (10.8%)                      | 6 (7.0%)                                                    |
| <b>Relationship Status, n (%)</b>     |                                |                                                             |
| Married/ relationship                 | 53 (71.6%)                     | 65 (75.6%)                                                  |
| Divorced                              | 11 (14.9%)                     | 9 (10.5%)                                                   |
| Single                                | 6 (8.1%)                       | 6 (7.0%)                                                    |
| Widowed                               | 4 (5.4%)                       | 5 (5.8%)                                                    |
| Missing                               | 0                              | 1 (1.2%)                                                    |
| <b>Religion, n (%)</b>                |                                |                                                             |
| Catholic                              | 28 (37.8%)                     | 32 (37.2%)                                                  |
| Non-Catholic Christian                | 23 (31.1%)                     | 29 (33.7%)                                                  |
| None                                  | 10 (13.5%)                     | 12 (14.0%)                                                  |
| Jewish                                | 5 (6.8%)                       | 2 (2.3%)                                                    |
| Muslim                                | 0                              | 2 (2.3%)                                                    |
| Atheist                               | 0                              | 2 (2.3%)                                                    |
| Other                                 | 7 (9.5%)                       | 6 (7.0%)                                                    |
| Missing                               | 1 (1.3%)                       | 1 (1.2%)                                                    |
| <b>Education, n (%)</b>               |                                |                                                             |
| High school                           | 16 (21.9%)                     | 26 (30.2%)                                                  |
| College                               | 34 (45.9%)                     | 38 (44.2%)                                                  |
| Post-Graduate                         | 23 (31.1%)                     | 21 (24.4%)                                                  |
| Missing                               | 1 (1.3%)                       | 1 (1.2%)                                                    |
| <b>Income, n (%)</b>                  |                                |                                                             |
| < \$25,0000                           | 13 (17.6%)                     | 8 (9.3%)                                                    |
| \$25,000 - \$50,0000                  | 14 (18.9%)                     | 18 (20.9%)                                                  |
| \$50,000 - \$100,000                  | 20 (27.0%)                     | 25 (29.1%)                                                  |
| \$100,000 - \$150,000                 | 14 (18.9%)                     | 9 (10.5%)                                                   |
| > \$150,0000                          | 7 (9.5%)                       | 20 (23.3%)                                                  |
| Missing                               | 6 (8.1%)                       | 6 (7.0%)                                                    |
| <b>Baseline PRO, mean (SD)</b>        |                                |                                                             |
| QOL (FACT-Leukemia)                   | 115.7 (24.67)                  | 117.8 (24.45)                                               |
| Anxiety Symptoms (HADS-Anxiety)       | 6.2 (4.11)                     | 6.4 (4.55)                                                  |
| Depression Symptoms (HADS-Depression) | 5.6 (3.26)                     | 5.5 (3.90)                                                  |
| Depressive Syndrome (PHQ-9)           | 6.9 (4.94)                     | 6.3 (5.04)                                                  |
| Symptom burden (ESAS-Total)           | 27.6 (17.75)                   | 27.5 (17.77)                                                |
| PTSD Symptoms (PTSD-Checklist)        | 27.6 (10.62)                   | 29.1 (11.51)                                                |

**eTable 2**

| <b>Secondary Outcomes</b>                                  | <b>P-Value</b> | <b>Critical P-Value</b> | <b>Benjamini-Hochberg Adjusted P-value</b> | <b>Significant using an FDR 0.15</b> |
|------------------------------------------------------------|----------------|-------------------------|--------------------------------------------|--------------------------------------|
| <b>PTSD symptoms longitudinally</b>                        | 0.002          | 0.009                   | 0.032                                      | <b>Yes</b>                           |
| <b>Receipt of chemotherapy in the last 30 days of life</b> | 0.008          | 0.019                   | 0.064                                      | <b>Yes</b>                           |
| <b>PTSD symptoms at week-2</b>                             | 0.009          | 0.028                   | 0.048                                      | <b>Yes</b>                           |
| <b>Patient-report discussing EOL care preferences</b>      | 0.009          | 0.037                   | 0.036                                      | <b>Yes</b>                           |
| <b>Anxiety symptoms at week-2</b>                          | 0.018          | 0.047                   | 0.058                                      | <b>Yes</b>                           |
| <b>Depression symptoms at week-2</b>                       | 0.021          | 0.056                   | 0.056                                      | <b>Yes</b>                           |
| <b>Depression symptoms longitudinally</b>                  | 0.039          | 0.066                   | 0.088                                      | <b>Yes</b>                           |
| <b>Anxiety symptoms longitudinally</b>                     | 0.042          | 0.075                   | 0.084                                      | <b>Yes</b>                           |
| <b>PHQ-9 at week-2</b>                                     | 0.044          | 0.084                   | 0.078                                      | <b>Yes</b>                           |
| <b>QOL longitudinally</b>                                  | 0.048          | 0.094                   | 0.077                                      | <b>Yes</b>                           |
| <b>Symptom burden at week-2</b>                            | 0.123          | 0.103                   | 0.179                                      | No                                   |
| <b>Hospice length-of-stay</b>                              | 0.135          | 0.112                   | 0.180                                      | No                                   |
| <b>Hospitalizations in the last week of life</b>           | 0.430          | 0.122                   | 0.326                                      | No                                   |
| <b>PHQ-9 Depression Syndrome longitudinally</b>            | 0.375          | 0.131                   | 0.428                                      | No                                   |
| <b>Symptom burden longitudinally</b>                       | 0.659          | 0.141                   | 0.703                                      | No                                   |
| <b>Hospice utilization</b>                                 | 0.999          | 0.150                   | 0.999                                      | No                                   |

eFigure 1:

eFigure 1A

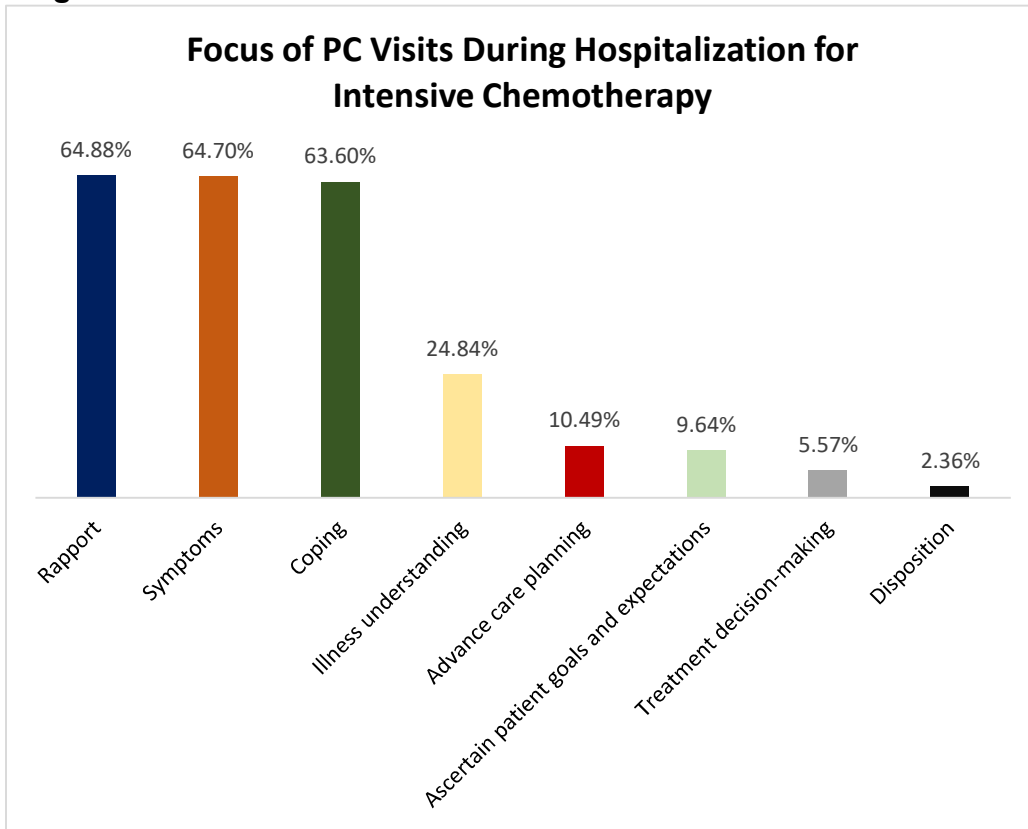

**eFigure 1B**

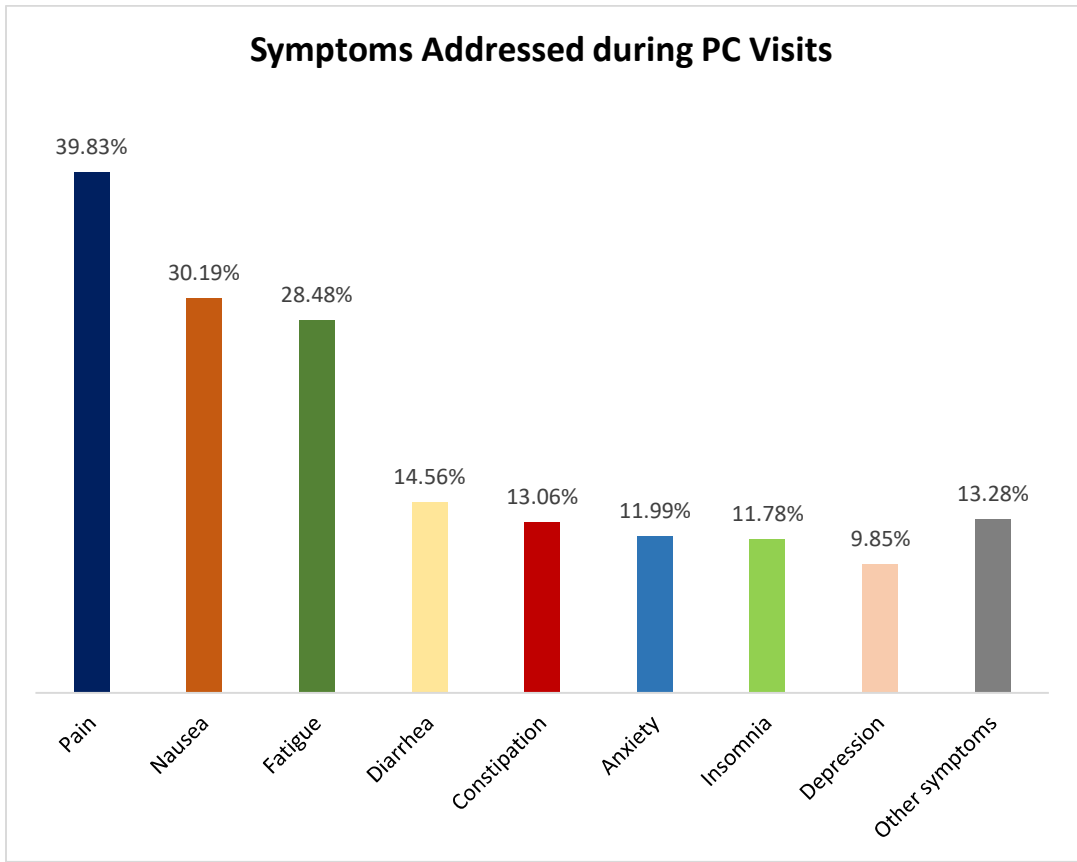

**eFigure 2**

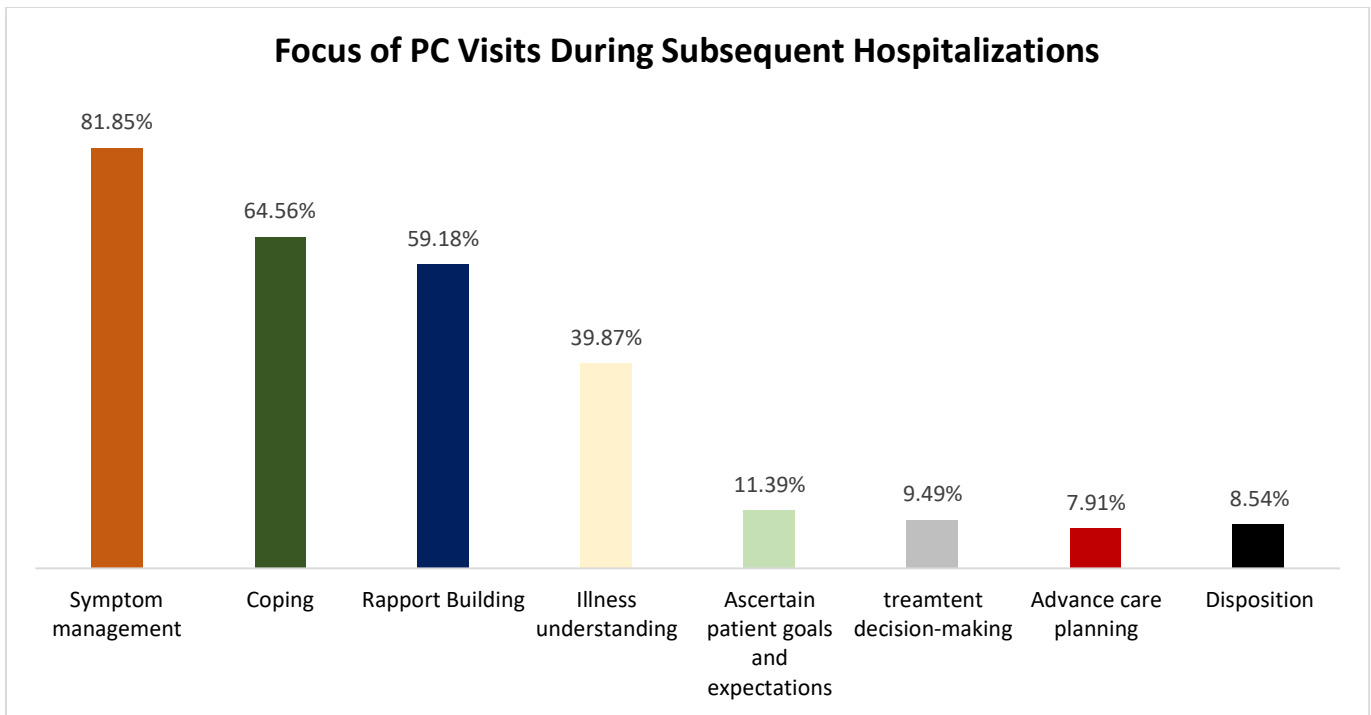

Supplement: jamaoncol-e206343-s002.pdf [file jamaoncol-e206343-s002.pdf]
