# Supplementary material
Source: PubMed Central journal article supplement (PMC7747042)
Supplement: jamaoncol-e206343-s003.pdf [file jamaoncol-e206343-s003.pdf]

## Data Sharing Statement

El-Jawahri. Effectiveness of Integrated Palliative and Oncology Care for Patients With Acute Myeloid Leukemia. *JAMA Oncol*. Published December 17, 2020. doi:10.1001/jamaoncol.2020.6343

### Data

**Data available:** Yes

**Data types:** Deidentified participant data

**How to access data:** request from the author

**When available:** With publication

### Supporting Documents

**Document types:** Statistical/analytic code

**How to access documents:** request from the author

**When available:** With publication

### Additional Information

**Who can access the data:** any researcher requesting the information and obtaining a data user agreement

**Types of analyses:** research purposes

**Mechanisms of data availability:** request from the investigator and with a signed data access agreement
